# Supplementary material for: Authentication of the Herbal Medicine Angelicae Dahuricae Radix Using an ITS Sequence-Based Multiplex SCAR Assay
Source: PubMed Central journal article supplement (PMC6225120; doi:10.3390/molecules23092134), 2018-08-24
Supplement: molecules-23-02134-s001.pdf [file molecules-23-02134-s001.pdf]

## Supplementary Materials: Authentication of the Herbal Medicine *Angelicae Dahuricae Radix* Using an ITS Sequence-Based Multiplex SCAR Assay

Pureum Noh, Wook Jin Kim, Sungyu Yang, In Kyu Park and Byeong Cheol Moon

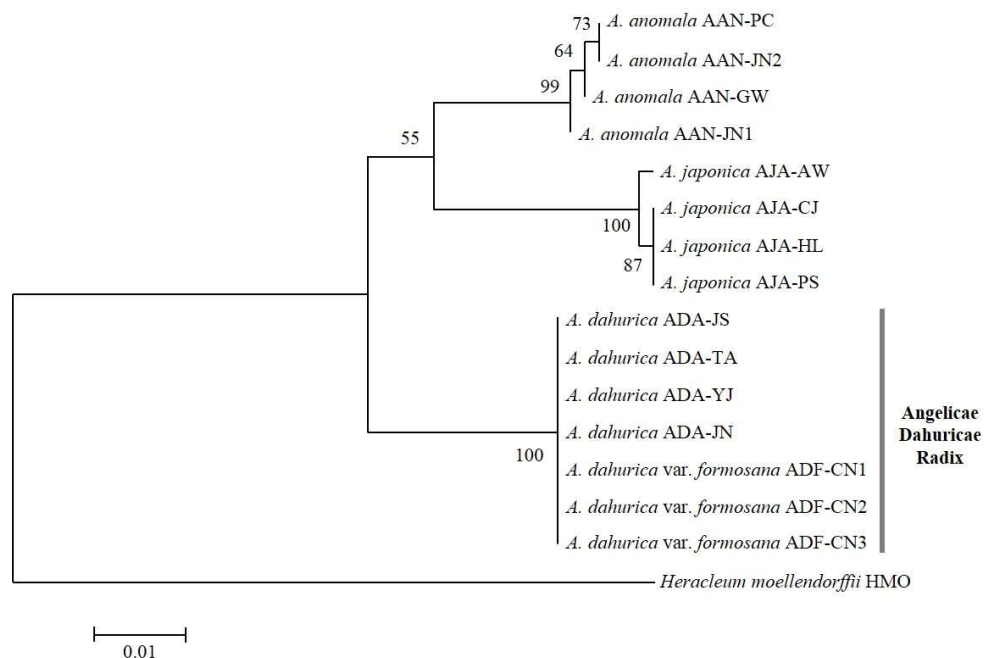

**Figure S1.** Phylogenetic tree showing the relationship among 15 samples of three *Angelica* species based on sequences of the internal transcribed spacer (ITS) regions. The tree was constructed using the maximum likelihood method, with 1000 bootstrap replicates. Bootstrap values are indicated at the nodes. The ITS sequence of *Heracleum moellendorffii* Hance (GenBank accession number: MH188445) served as an out-group.

**Table S1.** List of plant samples and commercial herbal medicines investigated using a multiplex SCAR assay developed in this study.

| Sample Name                              | Origin                                  | Manufacturer               | Collection Date | Lane in Gel (Figure 5) |
|------------------------------------------|-----------------------------------------|----------------------------|-----------------|------------------------|
| <i>A. dahurica</i>                       | Beonam, Jangsu, Jeonbuk, Korea          | -                          | 2015-09-11      | 1                      |
| <i>A. dahurica</i> var. <i>formosana</i> | Nangang, Harbin, Heilongjiang, China    | -                          | 2014-08-06      | 2                      |
| <i>A. anomala</i>                        | Bongpyeong, Pyeongchang, Gangwon, Korea | -                          | 2015-07-29      | 3                      |
|                                          | Gohan, Jeongseon, Gangwon, Korea        | -                          | 2017-08-10      | 4                      |
| <i>A. japonica</i>                       | Chuja, Jeju, Jeju, Korea                | -                          | 2015-07-15      | 5                      |
|                                          | Hallim, Jeju, Jeju, Korea               | -                          | 2016-12-05      | 6                      |
|                                          | Unidentified                            | Unidentified               | 2017-06-20      | 7                      |
|                                          | Sichuan, China                          | S○○ pharmaceutical company | 2015-01-08      | 8                      |
|                                          | Gunwui, Gyeongbuk, South Korea          | D○○ pharmaceutical company | 2014-07-07      | 9                      |
|                                          | China                                   | D○○ pharmaceutical company | 2014-07-07      | 10                     |
|                                          | China                                   | G○○ pharmaceutical company | 2014-07-07      | 11                     |
|                                          | South Korea                             | G○○ pharmaceutical company | 2014-07-07      | 12                     |
|                                          | Gyeongbuk, South Korea                  | D○○ pharmaceutical company | 2009-09-07      | 13                     |
|                                          | Jungsun, Gangwon, South Korea           | U○○ pharmaceutical company | 2017-10-11      | 14                     |
|                                          | Yeongyang, Gyeongbuk, South Korea       | G○○ pharmaceutical company | 2017-10-11      | 15                     |
| Angelicae Dahuricae Radix                | Zhejiang, China                         | G○○ pharmaceutical company | 2017-10-11      | 16                     |
|                                          | Gyeongbuk, South Korea                  | D○○ pharmaceutical company | 2017-10-11      | 17                     |
|                                          | China                                   | D○○ pharmaceutical company | 2017-10-11      | 18                     |
|                                          | China                                   | Yak Jae ○○                 | 2017-10-11      | 19                     |
|                                          | Jeonnam, South Korea                    | Ji Ri San ○○               | 2017-10-11      | 20                     |
|                                          | Bonghwa, Gyeongbuk, South Korea         | Bon Cho ○○                 | 2017-10-11      | 21                     |
|                                          | South Korea                             | Dong Gwang ○○              | 2017-10-11      | 22                     |
|                                          | Yeongju, Gyeongbuk, South Korea         | Hyo Sa Mo ○○               | 2017-10-11      | 23                     |
|                                          | South Korea                             | Jung Woo ○○                | 2017-10-11      | 24                     |
|                                          | Bonghwa, Gyeongbuk, South Korea         | Seo Hyeon ○○               | 2017-10-11      | 25                     |
| Hoengseong, Gangwon, South Korea         | Yong Sam ○○                             | 2017-10-11                 | 26              |                        |
